# Supplementary material
Source: PubMed Central journal article supplement (PMC2947164)
Supplement: tpc.110.078519_1.pdf [file tpc.110.078519_1.pdf]

**Supplemental Table 1. IAIC Workshop Participants and Their Affiliations.***Primary Contributors – Workshop attendees and organizers, and significant contributors to the final report*

|          |           |                                           |
|----------|-----------|-------------------------------------------|
| Ruth     | Bastow    | GARNet, UK                                |
| Jim      | Beynon    | University of Warwick, UK                 |
| Mark     | Estelle   | University of California - San Diego, USA |
| Joanna   | Friesner  | NAASC, USA                                |
| Erich    | Grotewold | ABRC & The Ohio State University, USA     |
| Irene    | Lavagi    | MASC, UK                                  |
| Keith    | Lindsey   | Durham University, UK                     |
| Blake    | Meyers    | University of Delaware, USA               |
| Nicholas | Provar    | University of Toronto, Canada             |

*Secondary Contributors – Workshop attendees and report section contributors*

|           |            |                                                                                     |
|-----------|------------|-------------------------------------------------------------------------------------|
| Philip    | Benfey     | Duke University, USA                                                                |
| Ewan      | Birney     | European Bioinformatics Institute, UK                                               |
| Pascal    | Braun      | Dana-Farber Cancer Institute & Harvard Medical School, USA                          |
| Volker    | Brendel    | PlantGDB & Iowa State University, USA                                               |
| Robin     | Buell      | Michigan State University, USA                                                      |
| Mario     | Caccamo    | BBSRC Genome Analysis Centre, UK                                                    |
| Jim       | Carrington | Oregon State University, USA                                                        |
| Mike      | Cherry     | Saccharomyces DB & Stanford University, USA                                         |
| Joseph    | Ecker      | Salk Institute, USA                                                                 |
| Janan     | Eppig      | The Mouse Genome Database & The Jackson Laboratory, USA                             |
| Mark      | Forster    | Syngenta, UK                                                                        |
| Rodrigo   | Gutiérrez  | Pontificia Universidad Católica de Chile, Chile                                     |
| Pierre    | Hilson     | VIB Ghent, Belgium                                                                  |
| Eva       | Huala      | TAIR, Carnegie Institution for Science, USA                                         |
| Manpreet  | Katari     | New York University, USA                                                            |
| Paul      | Kersey     | European Bioinformatics Institute, UK                                               |
| Joerg     | Kudla      | Muenster University, Germany                                                        |
| Hong      | Ma         | Fudan University, China, & Pennsylvania State University, USA                       |
| Minami    | Matsui     | RIKEN, Japan                                                                        |
| Kathy     | Matthews   | FlyBase & Indiana University, USA                                                   |
| Sean      | May        | MASC, NASC & University of Nottingham, UK                                           |
| Klaus     | Mayer      | MIPS, Germany                                                                       |
| Andrew    | Millar     | University of Edinburgh, UK                                                         |
| Harvey    | Millar     | University of Western Australia, Australia                                          |
| Eric      | Mjolsness  | University of California - Irvine, USA                                              |
| Todd      | Mockler    | Oregon State University, USA                                                        |
| Basil     | Nikolau    | Iowa State University, USA                                                          |
| Magnus    | Nordborg   | Gregor Mendel Institute, Austria                                                    |
| Chris     | Rawlings   | Rothamsted Research, UK                                                             |
| Paul      | Schofield  | University of Cambridge, UK                                                         |
| Heiko     | Schoof     | Eu-SOL & Max Planck Institute, Germany                                              |
| Julian I. | Schroeder  | University of California - San Diego, USA                                           |
| Taner     | Sen        | MaizeGDB, USDA-ARS, Iowa State University, USA                                      |
| Dan       | Stanzione  | iPlant Collaborative & University of Texas at Austin, USA                           |
| Chris     | Town       | Craig Venter Institute, USA                                                         |
| Tetsuro   | Toyoda     | RIKEN, Japan                                                                        |
| Todd      | Vision     | University of North Carolina at Chapel Hill & NESCent, USA                          |
| Sean      | Walsh      | ETH Zurich, Switzerland                                                             |
| Xiujie    | Wang       | Chinese Academy of Sciences, China                                                  |
| Doreen    | Ware       | Gramene, USDA-ARS, CSHL, USA                                                        |
| Wolfram   | Weckwerth  | University of Vienna, Austria                                                       |
| Weicai    | Yang       | Institute of Genetics and Developmental Biology, Chinese Academy of Sciences, China |
